# Supplementary material
Source: publisher figshare collection journal article supplement (https://diabetesjournals.figshare.com/articles/dataset/_/14806587)
Supplement: Supplementary file 1 [file 1]

## Supplemental Table 1

### Human genome-wide

| Library                                                  | Type       | gRNAS              | gRNAs per gene | Addgene catalog number   |
|----------------------------------------------------------|------------|--------------------|----------------|--------------------------|
| Activity-optimized genome-wide library                   | Knockout   | 187,535            | 10             | 1000000100               |
| Broad GPP Brunello                                       | Knockout   | 76,441             | 4              | 73179<br>73178           |
| Gattinara                                                | Knockout   | 40,964             | 2              | 136986                   |
| Human GeCKO v2                                           | Knockout   | 123,411            | 6              | 1000000048<br>1000000049 |
| Human genome-wide library v1                             | Knockout   | 77,406             | 4              | 69763                    |
| Human improved genome-wide library v1                    | Knockout   | 90,709             | 5              | 67989                    |
| Reduced Double -RNA Library                              | Knockout   | 59,576             | 3              | 137999                   |
| sgRNA iBAR library                                       | Knockout   | 58,630             | 3              | 140633                   |
| Mini-human AsCpf1-based Library                          | Knockout   | 17,032 arrays      | 3-4            | 130630                   |
| Toronto KnockOut – Version 1                             | Knockout   | 176,500            | 12             | 1000000069               |
| Toronto KnockOut – Version 3                             | Knockout   | 70,948             | 4              | 90294<br>125517          |
| Two plasmid human activity-optimized genome-wide library | Knockout   | 187,536            | 10             | 1000000095               |
| Broad GPP Calabrese p65-HSF                              | Activation | 113,238            | 6              | 92379<br>92380           |
| CRISPRa-v2                                               | Activation | 104,540<br>209,080 | 5<br>10        | 83978<br>1000000091      |
| lncRNA Activation Library                                | Activation | 96,458             | 10             | 1000000106               |
| SAM v1 – 3 plasmid system                                | Activation | 70,290             | 3              | 1000000057<br>1000000074 |
| SAM v2 – 2 plasmid system                                | Activation | 70,290             | 3              | 1000000078               |
| Broad GPP Dolcetto                                       | Inhibition | 113,526            | 6              | 92385<br>92386           |
| CRISPRi-v2                                               | Inhibition | 104,535<br>209,070 | 5<br>10        | 83969<br>1000000090      |

## Mouse genome-wide

| Library                                                  | Type       | gRNAS              | gRNAs per gene | Addgene catalog number   |
|----------------------------------------------------------|------------|--------------------|----------------|--------------------------|
| Broad GPP Brie                                           | Knockout   | 78,637             | 4              | 73632<br>73633           |
| Gouda                                                    | Knockout   | 44,155             | 2              | 136987                   |
| Mouse GeCKO v2                                           | Knockout   | 130,209            | 6              | 1000000052<br>1000000053 |
| Mouse improved genome-wide library v1                    | Knockout   | 90,230             | 5              | 67988                    |
| Mouse Toronto KnockOut (mTKO)                            | Knockout   | 19,463             | ~5             | 159392<br>159393         |
| Retroviral Knockout Library                              | Knockout   | 90,230             | 5              | 104861                   |
| Two plasmid mouse activity-optimized genome-wide library | Knockout   | 188,509            | 10             | 1000000096               |
| Broad GPP Caprano p65-HSF                                | Activation | 134,076            | 6              | 92383<br>92384           |
| CRISPRa-v2                                               | Activation | 107,105<br>214,210 | 5<br>10        | 83996<br>1000000093      |
| SAM v1 – 3 plasmid system                                | Activation | 69,716             | 3              | 1000000075               |
| Broad GPP Dolomiti                                       | Inhibition | 134,560            | 6              | 104090<br>104091         |
| CRISPRi-v2                                               | Inhibition | 107,415<br>214,830 | 5<br>10        | 83987<br>1000000092      |

## Human sub-library

| Library                                                    | Type     | gRNAS  | gRNAs per gene    | Addgene catalog number     |
|------------------------------------------------------------|----------|--------|-------------------|----------------------------|
| Bassik Knockout Library                                    | Knockout | Varies | 10                | 101926-101934              |
| Bradley Human CRISPR Poison Exon Knockout Library          | Knockout | 9,508  | ~9 pairs/<br>exon | 138084                     |
| Broad GPP kinome Brunello                                  | Knockout | 3,052  | 4                 | 75314 75315<br>75312 75313 |
| Enriched subpools (kinase, nuclear, ribosomal, cell cycle) | Knockout | Varies | 10                | 51043-51048                |

|                                                                     |            |              |        |                  |
|---------------------------------------------------------------------|------------|--------------|--------|------------------|
| Focused Ras Synthetic Lethal Human CRISPR Knockout Library          | Knockout   | 6,661        | 50     | 92352            |
| Epigenetic Knockout Library                                         | Knockout   | 20,051       | 8      | 162256           |
| Interferon-Stimulated Gene Knockout Library                         | Knockout   | 15,416       | 8      | 125753           |
| Metabolic Gene Knockout Library                                     | Knockout   | 30,290       | 10     | 110066           |
| DNA Binding Domain-Focused Knockout Library                         | Knockout   | 8,658        | 6      | 123334           |
| Kinase Domain-Focused Knockout Library                              | Knockout   | 3,051        | 6      | 117725           |
| lncRNA Splicing-targeting Library                                   | Knockout   | 126,773      | Varies | 119977           |
| mTORC1 Focused Library                                              | Knockout   | 7,501        | 10     | 164084           |
| miRNA Knockout Library                                              | Knockout   | 8,382        | 4-5    | 112200           |
| Paired-guide RNA (pgRNA) Library for Long Non-coding RNAs (lncRNAs) | Knockout   | 12,472 pairs | Varies | 89640            |
| SLC Knockout Library                                                | Knockout   | 2,609        | 6      | 132552           |
| Transcription Factor Knockout Library                               | Knockout   | 11,364       | ~7     | 162275           |
| Neelamegham GlycoGene Library                                       | Knockout   | 3,637        | 10     | 140961           |
| RNA-Binding Protein Pooled Knockout Library                         | Knockout   | 12,472       | 10     | 141438           |
| CHyMERa Paralog & Dual-targeting hgRNA library                      | Knockout   | 92,746       | Varies | 155199           |
| CHyMERa Exon-deletion hgRNA library                                 | Knockout   | 91,948       | Varies | 155200           |
| hCRISPRa-v2                                                         | Activation | Varies       | 5      | 83980-83986      |
| Membrane Protein Activation Library                                 | Activation | 58,570       | 7-14   | 113345           |
| SLC Activation Library                                              | Activation | 3,342        | 6      | 132561           |
| CRiNCL - Human CRISPRi Non-coding Libraries                         | Inhibition | Varies       | 10     | 86538-86550      |
| hCRISPRi-v2                                                         | Inhibition | Varies       | 5      | 83971-83977      |
| CRISPRi titration libraries                                         | Inhibition | Varies       | Varies | 136478<br>136479 |

**Mouse sub-library**

| <b>Library</b>                                           | <b>Type</b> | <b>gRNAs</b>  | <b>gRNAs per gene</b> | <b>Addgene catalog number</b> |
|----------------------------------------------------------|-------------|---------------|-----------------------|-------------------------------|
| Bassik Knockout Library                                  | Knockout    | Varies        | 10                    | 1000000121-1000000130         |
| Broad GPP kinome Brie                                    | Knockout    | 2,852         | 4                     | 75317<br>75316                |
| CRISPR/Cas9-assisted Removal of Mitochondrial DNA (CARM) | Knockout    | 395           | N/A                   | 82480                         |
| Cardiac Transcriptional Regulators Library               | Knockout    | 14,671        | 6                     | 138015                        |
| Metabolic Gene Library                                   | Knockout    | 22,909        | 8                     | 160129                        |
| Metastasis CRISPR-Cpf1(Cas12a) Double Knockout Library   | Knockout    | 11,934 arrays | 4                     | 123361                        |
| SLC Knockout Library                                     | Knockout    | 2,384         | 6                     | 141436                        |
| Tumor Suppressor Gene Knockout Library                   | Knockout    | 286           | 4                     | 113584<br>113585              |
| Validation (mVAL) Library                                | Knockout    | 182           | 4                     | 159391                        |
| mCRISPRa-v2 libraries                                    | Activation  | Varies        | 5                     | 83998-84004                   |
| Transcription Factor Activation Library                  | Activation  | 51,762        | 20                    | 122131                        |
| mCRISPRi-v2 libraries                                    | Inhibition  | Varies        | 5                     | 83989-83995                   |
