# Supplementary material
Source: publisher figshare collection journal article supplement (https://diabetesjournals.figshare.com/articles/dataset/_/14806587)
Supplement: Supplementary file 2 [file 1]

**Supplemental Table 2**

| <b>Phenotype</b>                         | <b>Cell type</b>                | <b>Library</b>                         | <b>Assay</b>                                                                                                     | <b>Primary Findings</b>                                                               | <b>Reference</b> |
|------------------------------------------|---------------------------------|----------------------------------------|------------------------------------------------------------------------------------------------------------------|---------------------------------------------------------------------------------------|------------------|
| <b>GLUT4 exocytosis</b>                  | HeLa                            | GeCKO                                  | Cells expressing HA-GLUT4-GFP reporter stimulated with insulin, stained with anti-HA antibodies, and FACS sorted | RABIF identified as positive regulator of exocytosis                                  | Gulbranson 2017  |
| <b>Insulin production</b>                | iPS cell-derived beta-like cell | Activity-optimized genome-wide library | FACS sorting of GFP under insulin promoter                                                                       | Vitamin D receptor serves as a modulator of inflammation and beta cell survival       | Wei 2018         |
| <b>Insulin transcription and release</b> | MIN6                            | Genome-wide GeCKO                      | FACS sorting of cells stained with insulin antibodies                                                            | Identified multiple transcriptional, translational, and post-translational regulators | Fang 2019        |
| <b>Insulin-induced GLUT4 exocytosis</b>  | HeLa                            | Genome-wide GeCKO                      | Cells expressing HA-GLUT4-GFP reporter stimulated with insulin, stained with anti-HA antibodies, and FACS sorted | Exoc7/Exo70 plays critical role in GLUT4 exocytosis                                   | Wang 2019        |
| <b>Autoimmune protection</b>             | NIT-1                           | Genome-wide GeCKO                      | Cell survival after transplant into NOD mice                                                                     | Rnls knockout protects cell from diabetic autoimmune killing                          | Cai 2020         |
| <b>LDL uptake</b>                        | HuH7                            | Genome-wide GeCKO                      | Uptake of fluorescently conjugated LDL                                                                           | LDLR as positive regulator and MYLIP as negative regulator of LDL uptake              | Emmer 2021       |
